# Supplementary material for: Computational study of the post-transition state dynamics for the OH + CH3OH reaction probed by photodetachment of the CH3O−(H2O) anion
Source: Royal Society of Chemistry journal article supplement (doi:10.1039/d4cp01466a), 2024-01-01
Supplement: d4cp01466a2.pdf [file d4cp01466a2.pdf]

Supplementary materials

# Computational study of the post-transition state dynamics for the OH + CH<sub>3</sub>OH reaction probed by photodetachment of the CH<sub>3</sub>O<sup>-</sup> (H<sub>2</sub>O) anion

Tatsuhiro Murakami <sup>\*,†,1,2</sup> and Toshiyuki Takayanagi <sup>‡,1</sup>

<sup>1</sup>Department of Chemistry, Saitama University, Shimo-Okubo 255, Sakura-ku, Saitama City, Saitama, 338-8570, Japan

<sup>2</sup>Department of Materials & Life Sciences, Faculty of Science & Technology, Sophia University, 7-1 Kioicho, Chiyoda-ku, Tokyo, 102-8554, Japan

## Contents

**S1 Figures and Tables for the supporting information**

**S2**

---

\*Corresponding author

†E-mail: murakamit@mail.saitama-u.ac.jp, ORCID: 0000-0001-8904-8673

‡E-mail: tako@mail.saitama-u.ac.jp, ORCID:0000-0003-0563-9236

## S1 Figures and Tables for the supporting information

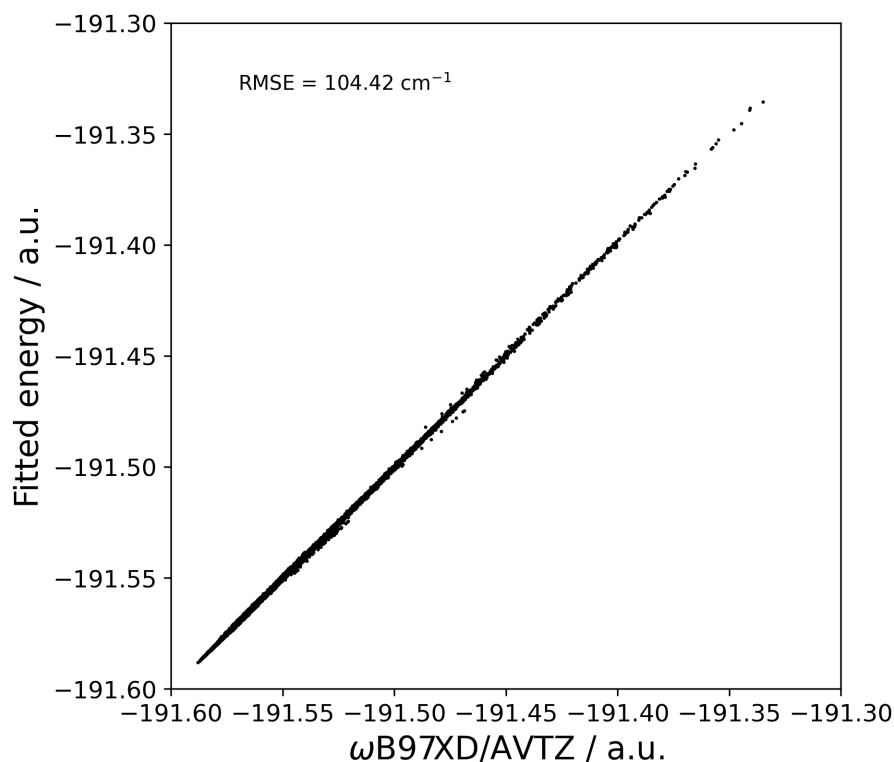

Figure S1: The potential energy fitted with respect to  $\omega$ B97XD/AVTZ energy

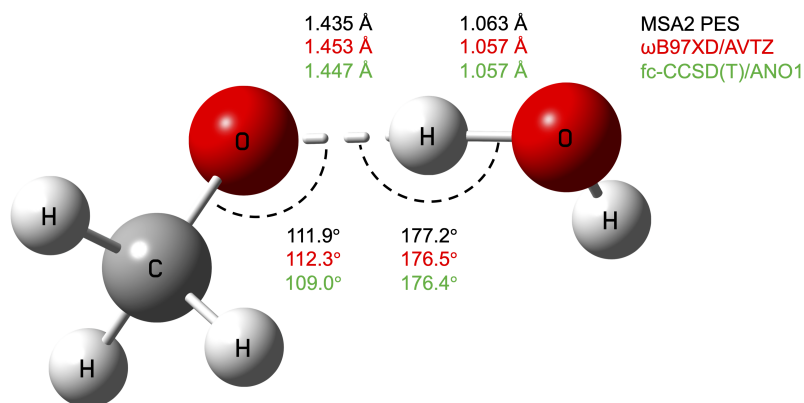

Figure S2: Comparison of the equilibrium geometry of the  $\text{CH}_3\text{O}^-(\text{H}_2\text{O})$  anion. The geometric parameters in black, red, blue, and green correspond to the fitted PES,  $\omega$ B97XD/aug-cc-pVTZ(AVTZ) outcomes, and the CCSD(T) results taken from Ref. 11, respectively.

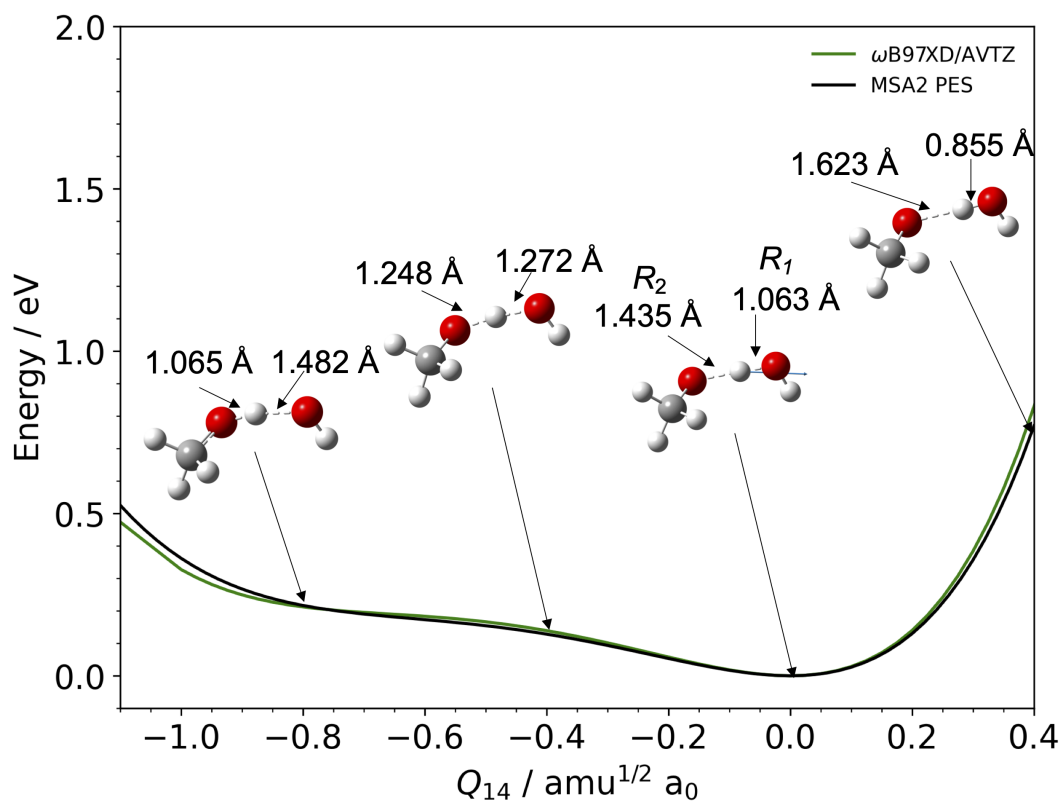

Figure S3: Potential energy curves of the MSA2 PES (black line) and the  $\omega\text{B97XD/AVTZ}$  PES (green line) along hydrogen transfer mode,  $Q_{14}$

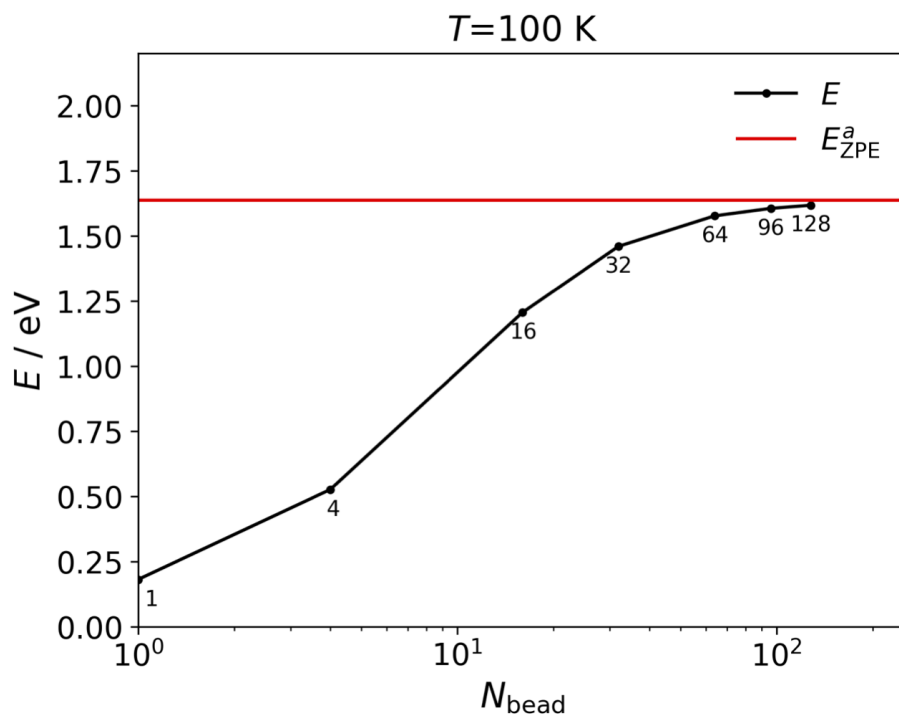

Figure S4: Convergence analysis of the number of beads at the temperature  $T = 100\text{ K}$ . Here,  $E$  denotes the internal energy of the anion system, while  $E_{ZPE}^a$  represents the zero-point vibrational energy.

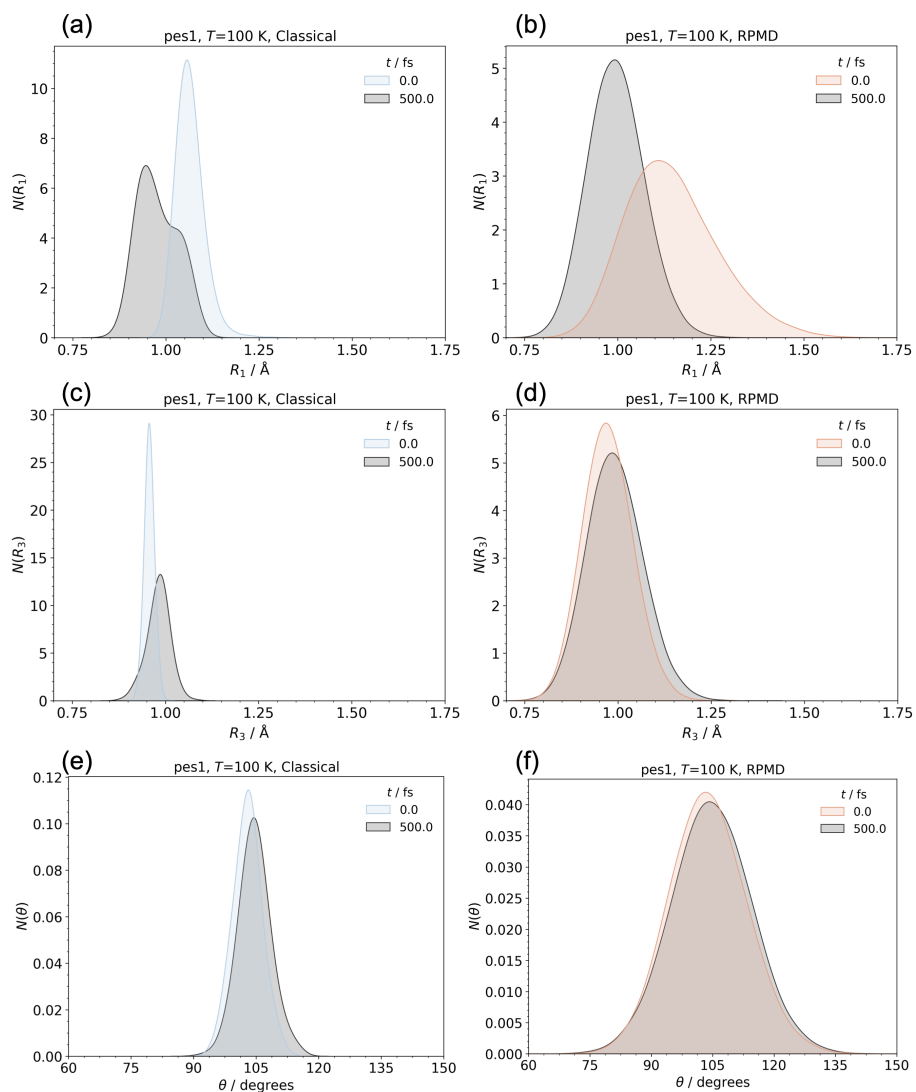

Figure S5: Time-dependent probability densities of (a)  $R_1$ , (c)  $R_3$ , and (e)  $\theta$  at  $t=0$  and 500 fs for classical MD, and (b)  $R_1$ , (d)  $R_3$ , and (f)  $\theta$  at  $t=0$  and 500 fs for RPMD on PES1.

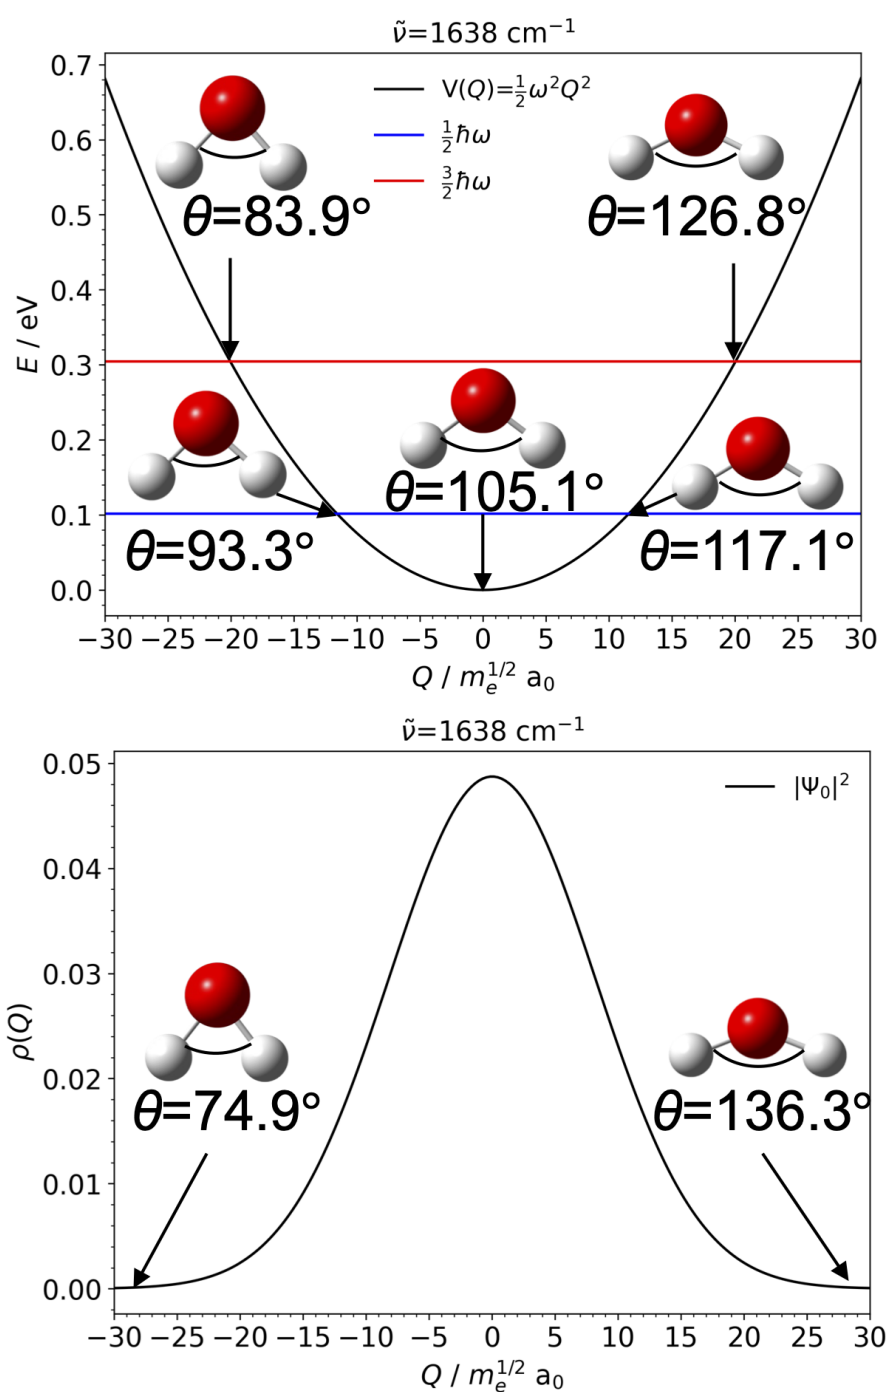

Figure S6: Harmonic potential curve (upper panel) and probability density of the zero-point wave function  $|\Psi_0|^2$  for bending motion computed using the  $\omega\text{B97XD/aug-cc-pVTZ}$  level of theory (lower panel), with bending angles at key geometries

Table S1: Relative energies (in eV) for the  $\text{CH}_3\text{O}^-(\text{H}_2\text{O})$  anion equilibrium structure,  $\text{CH}_3\text{OH} + \text{OH}^-$  and  $\text{CH}_3\text{O}^- + \text{H}_2\text{O}$  fragments calculated by the  $\omega\text{B97XD}/\text{AVTZ}$  and the mHEAT-345(Q) methods. The latter is based on the high-accuracy extrapolated *ab initio* thermochemistry (HEAT) model, as used in Ref. 11. The potential energy of the equilibrium structure is set to zero.

| method               | $\text{CH}_3\text{OH} + \text{OH}^-$ | $\text{CH}_3\text{O}^-(\text{H}_2\text{O})$ | $\text{CH}_3\text{O}^- + \text{H}_2\text{O}$ |
|----------------------|--------------------------------------|---------------------------------------------|----------------------------------------------|
| $\omega\text{B97XD}$ | 1.363                                | 0.000                                       | 1.071                                        |
| mHEAT-345(Q)         | 1.35                                 | 0.00                                        | 1.00                                         |

Table S2: Comparison of harmonic vibrational frequencies (in  $\text{cm}^{-1}$ ) for the equilibrium structure of the  $\text{CH}_3\text{O}^-(\text{H}_2\text{O})$  anion, computed using the fitted MSA2 PES function,  $\omega\text{B97XD}/\text{AVTZ}$ , and fc-CCSD(T)/ANO1 as reported in Ref. 11

| $\tilde{\nu}_\alpha$ | MSA2 PES | $\omega\text{B97XD}$ | CCSD(T) |
|----------------------|----------|----------------------|---------|
| $\tilde{\nu}_1$      | 54.3     | 43.8                 | 76.5    |
| $\tilde{\nu}_2$      | 92.1     | 111.2                | 106.6   |
| $\tilde{\nu}_3$      | 141.7    | 146.7                | 149.8   |
| $\tilde{\nu}_4$      | 350.5    | 350.6                | 379.7   |
| $\tilde{\nu}_5$      | 603.0    | 559.9                | 567.4   |
| $\tilde{\nu}_6$      | 1151.5   | 1153.5               | 1144.0  |
| $\tilde{\nu}_7$      | 1176.3   | 1177.9               | 1184.7  |
| $\tilde{\nu}_8$      | 1181.2   | 1181.2               | 1186.8  |
| $\tilde{\nu}_9$      | 1313.7   | 1278.0               | 1325.7  |
| $\tilde{\nu}_{10}$   | 1459.6   | 1460.4               | 1469.0  |
| $\tilde{\nu}_{11}$   | 1474.2   | 1470.3               | 1484.6  |
| $\tilde{\nu}_{12}$   | 1480.3   | 1477.9               | 1494.8  |
| $\tilde{\nu}_{13}$   | 1697.0   | 1679.1               | 1721.2  |
| $\tilde{\nu}_{14}$   | 2030.3   | 2112.0               | 2179.2  |
| $\tilde{\nu}_{15}$   | 2717.9   | 2706.9               | 2708.5  |
| $\tilde{\nu}_{16}$   | 2748.3   | 2736.2               | 2738.1  |
| $\tilde{\nu}_{17}$   | 2784.2   | 2776.5               | 2782.3  |
| $\tilde{\nu}_{18}$   | 3939.9   | 3932.4               | 3869.2  |

Table S3: Optimized geometry (in xyz format) of the CH<sub>3</sub>O<sup>-</sup>(H<sub>2</sub>O) anion obtained using the MSA2 PES function

| 1  | 8    |             |             |             |
|----|------|-------------|-------------|-------------|
| 2  | MSA2 | PES         |             |             |
| 3  | H    | -2.06358100 | 0.38414200  | 0.90022100  |
| 4  | H    | -0.93682300 | 1.35061100  | -0.06453600 |
| 5  | H    | -2.11364200 | 0.29976900  | -0.86560200 |
| 6  | H    | 2.04306600  | 0.28843500  | 0.81841600  |
| 7  | H    | 0.84208400  | -0.20543700 | -0.08078600 |
| 8  | C    | -1.40351100 | 0.33828300  | -0.00231300 |
| 9  | O    | -0.50829600 | -0.67897500 | 0.02020700  |
| 10 | O    | 1.83954100  | 0.16057300  | -0.10693700 |

Table S4: Optimized geometry (xyz format) of the CH<sub>3</sub>O<sup>-</sup>(H<sub>2</sub>O) anion calculated by the  $\omega$ B97XD/AVTZ level

| 1  | 8                   |           |           |           |
|----|---------------------|-----------|-----------|-----------|
| 2  | $\omega$ B97XD/AVTZ |           |           |           |
| 3  | C                   | -1.413488 | 0.334595  | 0.002951  |
| 4  | O                   | -0.510128 | -0.674738 | 0.010885  |
| 5  | H                   | -2.151495 | 0.289333  | 0.842552  |
| 6  | H                   | -0.958214 | 1.351600  | 0.079158  |
| 7  | H                   | -2.045405 | 0.377341  | -0.919978 |
| 8  | H                   | 0.855910  | -0.191656 | -0.093030 |
| 9  | O                   | 1.849097  | 0.169213  | -0.104796 |
| 10 | H                   | 2.068378  | 0.210020  | 0.824882  |

Table S5: Optimized geometry (in xyz format) of the TS structure obtained from calculations using PES1

| 1  | 8    |                 |                 |                 |
|----|------|-----------------|-----------------|-----------------|
| 2  | PES1 | TS              |                 |                 |
| 3  | C    | -1.521974183487 | -0.281836043022 | 0.000014212562  |
| 4  | O    | -0.384039621394 | 0.569809798126  | -0.000043119817 |
| 5  | H    | -2.436900051327 | 0.307785505085  | 0.000827286400  |
| 6  | H    | -1.518949370792 | -0.916935219470 | -0.883999696368 |
| 7  | H    | -1.518051930528 | -0.917730097457 | 0.883391078140  |
| 8  | H    | 0.697939310835  | 0.221379086905  | -0.000178673717 |
| 9  | O    | 1.878117292047  | -0.065758580358 | -0.000318570178 |
| 10 | H    | 1.955202554646  | -1.035903449809 | 0.000287482978  |



Table S6: Optimized geometry (in xyz format) of the RC structure obtained from calculations using PES1

|    |      |    |                 |                 |
|----|------|----|-----------------|-----------------|
| 1  | 8    |    |                 |                 |
| 2  | PES1 | RC |                 |                 |
| 3  | C    |    | -2.060474609404 | -0.208374488638 |
| 4  | O    |    | -0.883601392144 | 0.587853332970  |
| 5  | H    |    | -2.946720685445 | 0.424428653558  |
| 6  | H    |    | -2.083234173041 | -0.856738937206 |
| 7  | H    |    | -2.093836093060 | -0.830609344396 |
| 8  | H    |    | -0.041941582257 | 0.127757780296  |
| 9  | O    |    | 2.925500895811  | -0.227156281087 |
| 10 | H    |    | 1.975498459490  | -0.020785212240 |
|    |      |    |                 | -0.001225384932 |
|    |      |    |                 | -0.005805404687 |
|    |      |    |                 | -0.015810301564 |
|    |      |    |                 | -0.876019979427 |
|    |      |    |                 | 0.891946821107  |
|    |      |    |                 | 0.006282285329  |
|    |      |    |                 | 0.005657302264  |
|    |      |    |                 | 0.005466635479  |

Table S7: Optimized geometry (in xyz format) of the PC structure obtained from calculations using PES1

|    |      |    |                 |                 |
|----|------|----|-----------------|-----------------|
| 1  | 8    |    |                 |                 |
| 2  | PES1 | PC |                 |                 |
| 3  | C    |    | -2.296073114156 | 0.137648880576  |
| 4  | O    |    | -0.919139033148 | 0.107242536099  |
| 5  | H    |    | -2.589459749023 | 0.501717104649  |
| 6  | H    |    | -2.706547592957 | -0.853805983479 |
| 7  | H    |    | -2.718547569102 | 0.789935920896  |
| 8  | H    |    | 3.293513683933  | -0.534328473741 |
| 9  | O    |    | 2.963819835459  | -0.068245370524 |
| 10 | H    |    | 2.000291183862  | -0.024340768648 |
|    |      |    |                 | -0.033906780875 |
|    |      |    |                 | 0.074211607198  |
|    |      |    |                 | -1.009121270912 |
|    |      |    |                 | 0.100955790045  |
|    |      |    |                 | 0.718144371674  |
|    |      |    |                 | -0.264930043893 |
|    |      |    |                 | 0.521647846473  |
|    |      |    |                 | 0.397236884644  |

Table S8: Optimized geometry (in xyz format) of the TS structure obtained from calculations using PES2

|    |      |    |                 |                 |
|----|------|----|-----------------|-----------------|
| 1  | 8    |    |                 |                 |
| 2  | PES2 | TS |                 |                 |
| 3  | C    |    | -1.416748129657 | -0.284225659340 |
| 4  | O    |    | -0.313991127701 | 0.053226519467  |
| 5  | H    |    | -2.248638927592 | 0.338443343701  |
| 6  | H    |    | -1.195215486678 | -0.062161191832 |
| 7  | H    |    | -1.667646646501 | -1.332779391054 |
| 8  | H    |    | 0.624090904851  | -0.595583446566 |
| 9  | O    |    | 1.600238877906  | -0.596979043701 |
| 10 | H    |    | 1.769254535375  | 0.360869869328  |
|    |      |    |                 | -0.060221351227 |
|    |      |    |                 | 0.766862521567  |
|    |      |    |                 | 0.272796498686  |
|    |      |    |                 | -1.104360866585 |
|    |      |    |                 | 0.033735985540  |
|    |      |    |                 | 0.539999801373  |
|    |      |    |                 | -0.205762621176 |
|    |      |    |                 | -0.243069968180 |

Table S9: Optimized geometry (in xyz format) of the RC structure obtained from calculations using PES2

|    |      |    |                 |                 |
|----|------|----|-----------------|-----------------|
| 1  | 8    |    |                 |                 |
| 2  | PES2 | RC |                 |                 |
| 3  | C    |    | -1.832271739778 | -0.014983016841 |
| 4  | O    |    | -0.458400947439 | -0.333422253350 |
| 5  | H    |    | -2.079271895168 | 0.810715878744  |
| 6  | H    |    | -2.438128727461 | -0.882009183468 |
| 7  | H    |    | -1.997894971934 | 0.277434622940  |
| 8  | H    |    | -0.229678929765 | -1.056190792971 |
| 9  | O    |    | 2.229230345183  | -0.429503536257 |
| 10 | H    |    | 1.283724944924  | -0.168548588597 |

Table S10: Optimized geometry (in xyz format) of the PC structure obtained from calculations using PES2

|    |      |    |                 |                 |
|----|------|----|-----------------|-----------------|
| 1  | 8    |    |                 |                 |
| 2  | PES2 | PC |                 |                 |
| 3  | C    |    | -0.750386086034 | -0.273466094211 |
| 4  | O    |    | -1.600819920314 | 0.430927836592  |
| 5  | H    |    | -0.999789076573 | -0.238054130085 |
| 6  | H    |    | 0.303419750104  | 0.103362354742  |
| 7  | H    |    | -0.794762710336 | -1.364073113146 |
| 8  | H    |    | 1.237597011336  | -0.883442282662 |
| 9  | O    |    | 2.071177274127  | -0.810481547796 |
| 10 | H    |    | 2.549893378220  | -1.643070262896 |
